# Supplementary material for: Easy Volcanic Aerosol (EVA v1.0): An idealized forcing generator for climate simulations
Source: Copernicus journal article supplement (doi:10.5194/gmd-2016-83), 2016-05-19
Supplement: Supplementary file 1 [file gmd-2016-83-supplement.zip]

Archive with 2 entries (2 files):
- EVAv1_users_guide_submit.pdf
- eva_v1_beta.tar
